# Supplementary material for: Regulating structural asymmetryviafluorination engineering in hybrid lead bromide perovskites
Source: Royal Society of Chemistry journal article supplement (doi:10.1039/d3cc02098c), 2023-01-01
Supplement: d3cc02098c1.pdf [file d3cc02098c1.pdf]

## Electronic Supporting Information

### **Regulating structural asymmetry via fluorination engineering in hybrid lead bromide perovskites**

Hua-Yang Ru,<sup>a</sup> Zhao-Yang Wang,<sup>a</sup> Hua-Li Liu,<sup>\*a</sup> and Shuang-Quan Zang<sup>\*a</sup>

*<sup>a</sup>Henan Key Laboratory of Crystalline Molecular Functional Materials, Green Catalysis Center, and College of*

*Chemistry, Zhengzhou University, Zhengzhou 450001, China.*

## Experimental section

### Materials and reagents

All reagents and solvents were used directly as received without further purification. Isopropylamine hydrochloride (97%), (*R*)-1,1,1-trifluoropropan-2-amine hydrochloride (98%) and (*S*)-1,1,1-trifluoropropan-2-amine hydrochloride were purchased from Leyan reagent. Lead(II) bromide ( $\text{PbBr}_2$ ), and hydrobromic acid (HBr, 48 wt.% in  $\text{H}_2\text{O}$ ), methanol ( $\text{CH}_3\text{OH}$ , AR) were purchased from Energy Chemical.

### Synthesis

#### Preparation of **1R/2S** and $(\text{C}_3\text{H}_{10}\text{N})_3\text{PbBr}_5$ single crystals.

**1R/2S** or  $(\text{C}_3\text{H}_{10}\text{N})_3\text{PbBr}_5$  were prepared with stoichiometric quantities of  $\text{PbBr}_2$  (0.2 mmol, 0.074 g) and (*R*)-/(*S*)-1,1,1-trifluoropropan-2-amine hydrochloride (0.2 mmol, 0.030 g) or isopropylamine hydrochloride (0.2 mmol, 0.019 g) in mixed solution of HBr (1 mL) and  $\text{CH}_3\text{OH}$  (1 mL). A clear solution was afforded by heating the mixture at 130 °C and stirring for 20 min. And the crystals of **1R/2S** or  $(\text{C}_3\text{H}_{10}\text{N})_3\text{PbBr}_5$  were obtained at room temperature overnight. The crystals were washed with cold diethyl ether and dried under vacuum at 60 °C for 2 h. (Yield: 72%)

#### Fabrication of chiral thin films.

Quartz substrates ( $1.5 \times 1.5 \text{ cm}^2$ ) were washed by ethanol, acetone and deionized water in the ultrasonic cleaner for 10 min, respectively. Then, the substrates were treated in a plasma-cleaner with oxygen plasma to improve the surface wettability. To prepare chiral thin films, **1R/2S** or  $(\text{C}_3\text{H}_{10}\text{N})_3\text{PbBr}_5$  were dissolved in 0.1 mL DMF with a specific concentration (20 wt%) as the precursor solution. Subsequently, the resultant precursor solution was spin-coated on the quartz substrate at a speed of 3000 rpm for 30 s, followed by annealing at 60 °C for 10 min on a hot plate to induce crystallization. Spin-coating and annealing were performed in the  $\text{N}_2$ -filled glove box.

### Characterization

Powder X-ray Diffraction (PXRD) patterns of the samples were recorded on a D/MAX-3D diffractometer ( $\text{Cu K}\alpha$ ,  $\lambda = 1.5418 \text{ \AA}$ ). Simulated powder patterns were obtained with Mercury software and crystallographic information file (CIF) from a single crystal X-ray experiment. Steady-state photoluminescence (PL) spectroscopy were carried out with a HORIBA FluoroLog-3 fluorescence spectrometer. Luminescence lifetimes were performed on a HORIBA FluoroLog-3 fluorescence spectrometer that was equipped with a 370 nm-laser and was operating in time-correlated single-photon counting (TCSPC) mode. The photoluminescence quantum yields PLQYs were measured using an integrating sphere on a HORIBA Scientific Fluorolog-3 spectrofluorometer. UV-vis absorption spectra were obtained by means of a Hitachi UH4150 UV-visible spectrophotometer. (FTIR-ATR) spectra were conducted in the range of  $500\text{-}4000 \text{ cm}^{-1}$  on a Bruker ALPHA spectrometer. The Raman spectra were recorded on labRAM HR Evolution-HORIBA Raman system equipped with a CCD detector using a 532 nm He-Cd laser as the excitation source. Circular dichroism (CD) spectra were recorded on a Chirascan V100 spectropolarimeter. Circularly polarized luminescence (CPL) spectra were measured on a JASCO CPL-300.

#### Single-crystal X-ray diffraction Analysis.

The diffraction data of **1R/2S** and  $(\text{C}_3\text{H}_{10}\text{N})_3\text{PbBr}_5$  were collected on a Rigaku XtaLAB Pro diffractometer with  $\text{Cu-K}\alpha$  radiation ( $\lambda = 1.54184 \text{ \AA}$ ) at 200 K. Data collection and reduction were

performed using the program CrysAlisPro.<sup>[1]</sup> The crystal structures were solved with direct methods (SHELXS)<sup>[2]</sup> and refined by full-matrix least squares on F<sup>2</sup> using OLEX2,<sup>[3]</sup> which utilizes the SHELXL-2015 module.<sup>[4]</sup> The imposed restraints in least-squares refinement of each structure were noted in the corresponding CIF files. Thus only a general description of the structural refinement strategy is presented here. All non-hydrogen atoms were refined anisotropically. Hydrogen atoms were placed in calculated positions refined using idealized geometries and assigned fixed isotropic displacement parameters. Detailed information about the X-ray crystal data, intensity collection procedure, and refinement results for all organic-inorganic hybrid perovskites compounds is summarized in Table S1 and Table S8.

### Theoretical calculation.

We have employed the Vienna Ab initio Simulation Package (VASP)<sup>[5, 6]</sup> to perform all density functional theory (DFT) calculations within spin-polarized frame. The elemental core and valence electrons were represented by the projector augmented wave (PAW) method and plane-wave basis functions with a cutoff energy of 400 eV. Generalized gradient approximation with the Perdew-Burke-Ernzerhof (GGA-PBE) exchange-correlation functional was employed in the calculations.<sup>[7]</sup> Geometry optimizations were performed with the force convergence smaller than 0.05 eV/Å. The DFT-D3 empirical correction method was employed to describe van der Waals interactions.<sup>[8, 9]</sup> The original bulk structures of **1R**, **2S** and (C<sub>3</sub>H<sub>10</sub>N)<sub>3</sub>PbBr<sub>5</sub> have been optimized before the construction of surfaces with the Monkhorst-Pack k-point of 3×2×1, 1×2×3 and 3×2×1, respectively. The formation and dissociation energies are defined as:

$$\Delta E_{\text{fe}}=[E(\text{total})-E(\text{reference})]/\mu$$

$E(\text{total})$  is the total energy of **1R** or **2S** or (C<sub>3</sub>H<sub>10</sub>N)<sub>3</sub>PbBr<sub>5</sub>.  $\mu$  is the number of atoms in the cell.  $E(\text{reference})$  is the energy of the H<sub>7</sub>C<sub>3</sub>NF<sub>3</sub>, H<sub>10</sub>C<sub>3</sub>N molecule in the gas phase and the energy of Pb bulk, PbBr<sub>2</sub> bulk, graphite.

## Supporting Figures

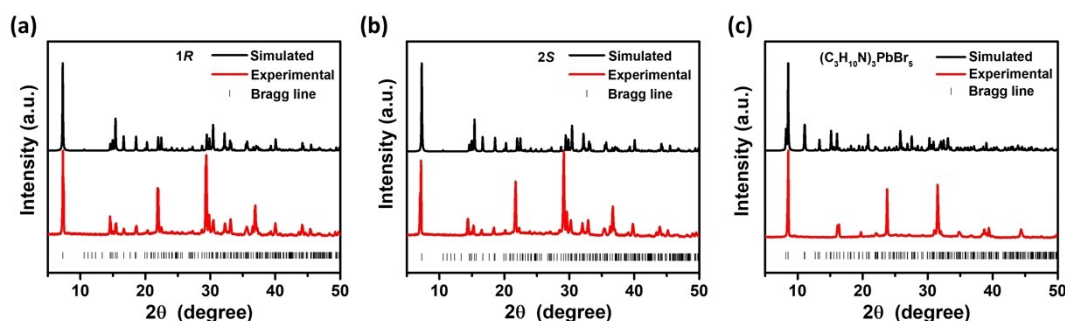

**Fig. S1** Powder X-ray diffraction patterns of (a) **1R**, (b) **2S** and (c)  $(\text{C}_3\text{H}_{10}\text{N})_3\text{PbBr}_5$ .

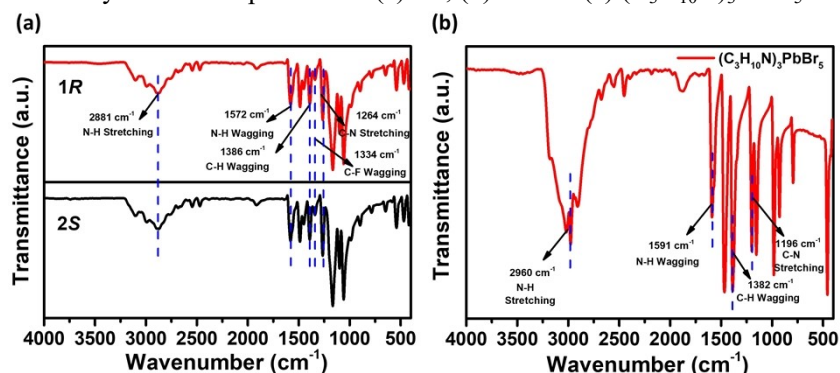

**Fig. S2** FTIR spectra of (a) **1R/2S** and (b)  $(\text{C}_3\text{H}_{10}\text{N})_3\text{PbBr}_5$  powders. The vibrational frequencies at 2881 and 1572  $\text{cm}^{-1}$  in **1R/2S**, 2960 and 1591  $\text{cm}^{-1}$  in  $(\text{C}_3\text{H}_{10}\text{N})_3\text{PbBr}_5$ , assigned to the stretching and wagging modes of the N-H bonds, respectively. The peaks located at 1386 and 1264  $\text{cm}^{-1}$  in **1R/2S**, 1382 and 1196  $\text{cm}^{-1}$  in  $(\text{C}_3\text{H}_{10}\text{N})_3\text{PbBr}_5$  were attributed to the stretching modes of C-H and C-N bonds. The vibration peaks at 1334  $\text{cm}^{-1}$  is attributed to the wagging mode of the C-F bonds in **1R/2S**.

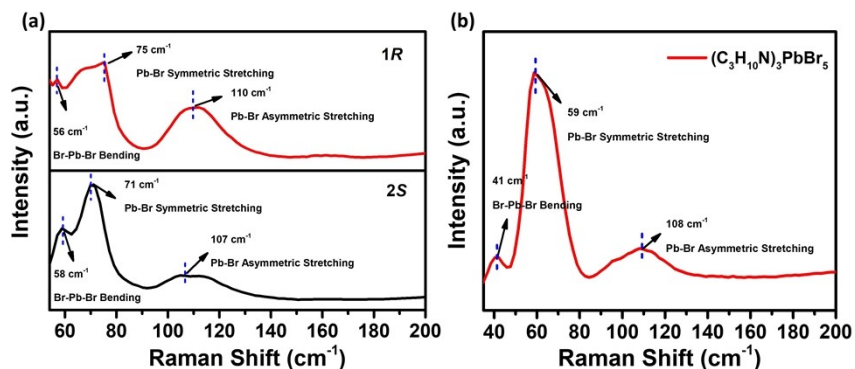

**Fig. S3** Raman spectra of (a) **1R/2S** and (b)  $(\text{C}_3\text{H}_{10}\text{N})_3\text{PbBr}_5$  crystals recorded at room temperature. The observed bands at about 56, 75 and 110  $\text{cm}^{-1}$  at **1R/2S**, 41, 59 and 108  $\text{cm}^{-1}$  at  $(\text{C}_3\text{H}_{10}\text{N})_3\text{PbBr}_5$ , correspond to the bending mode of Br-Pb-Br bond, symmetric and asymmetric stretching mode of Pb-Br bond.

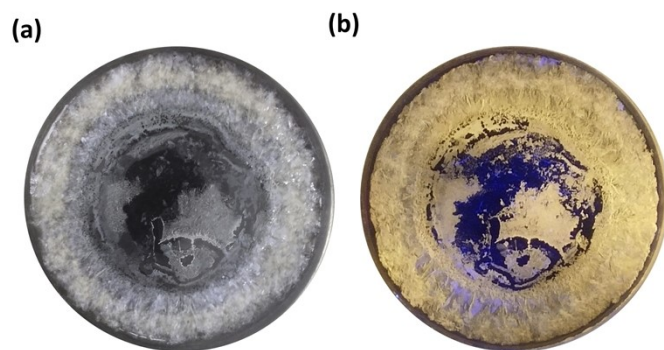

**Fig. S4** (a) Optical image and (b) fluorescent image of **1R** under UV light (365 nm).

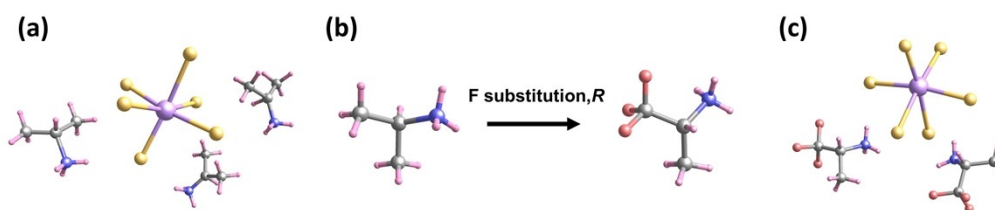

**Fig. S5** The illustration of asymmetry unit of (a)  $(C_3H_{10}N)_3PbBr_5$  and (c) **1R**. (b) Schematic structure of achiral ligand (left side) and F-substituted chiral ligand (right side).

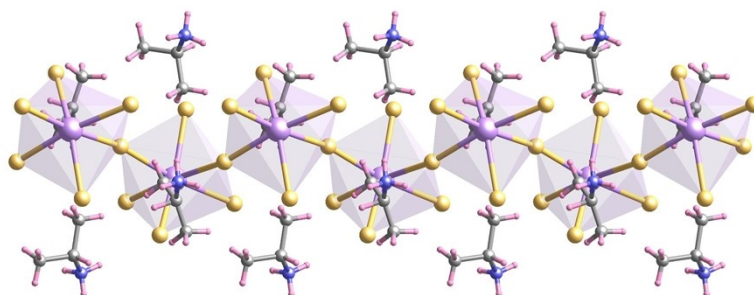

**Fig. S6** Infinite 1D chain of  $(C_3H_{10}N)_3PbBr_5$

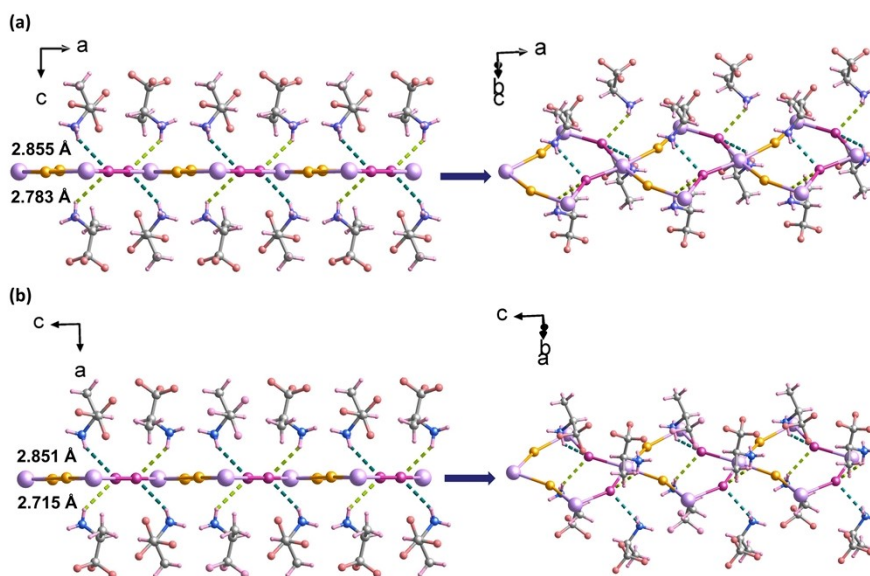

**Fig. S7** Hydrogen-bonding interactions between the equatorial Br atoms and *R*-/*S*-C<sub>3</sub>H<sub>7</sub>NF<sub>3</sub><sup>+</sup> cations in (a) **1R** and (b) **2S**.

The corresponding noncovalent H<sup>+</sup>⋯Br (yellow-labelled) contacts exceed the van der Waals cutoff of 3.05 Å, meaning that the H<sup>+</sup>⋯Br interactions are weak and negligible. The corresponding H<sup>+</sup>⋯Br (purple-marked) distances about both sides of the inorganic layer are 2.855 Å, 2.783 Å for **1R**, and 2.851 Å, 2.715 Å for **2S**, respectively.

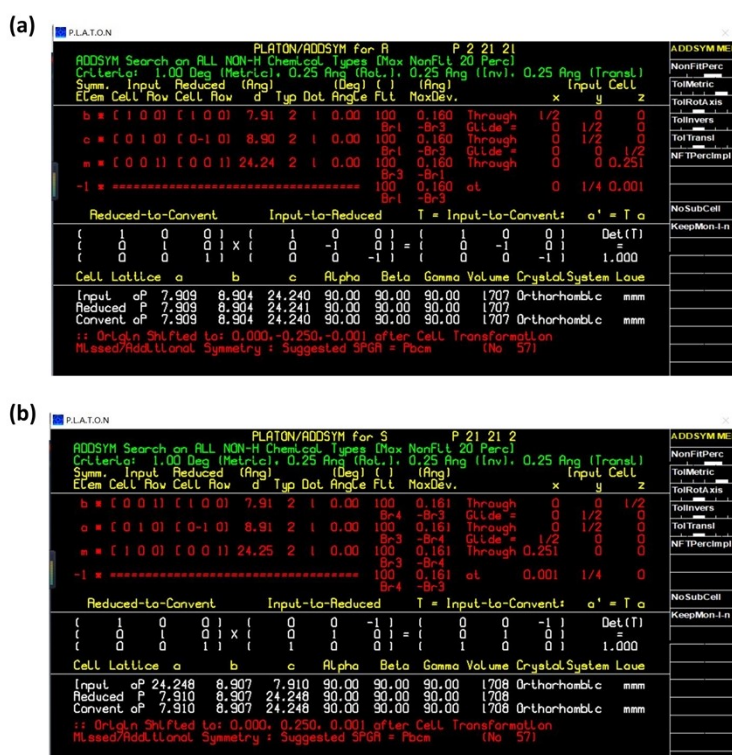

**Fig. S8** Post-refinement analysis for missing symmetry using PLATON's ADDSYM tool on isolated inorganic frameworks (i.e., without organic cations) in (a) **1R** and (b) **2S**. All the C, H, and N atoms were manually deleted from the fully refined structure using the CrystalMaker software.

```

PLATON
PLATON/ADDSYM for (C3H10N)3PP 21 21 21
ADDSYM Search on ALL NON-H Chemical Types (Max NonH: 20 Para)
Criteria: 1.00 Deg (Metric), 0.25 Ang (Rat.), 0.25 Ang (Inv), 0.25 Ang (Transl)
Summ. Input Reduced (Ang) (Deg) ( ) (Ang) Input Cell
Elem Cell Row Cell Row d Typ Dot Angle Flt MaxDev. x y z
2 1 1 0 0 1 1 0 0 0 8.62 2 1 0.00 100 0 Through 0 3/4 1/2
1 1 0 1 0 1 0 0 0 11.81 2 1 0.00 100 0 Through 1/2 0 1/4
2 1 0 0 1 1 0 0 0 21.55 2 1 0.00 100 0 Through 1/4 1/2 0
1 1 0 0 1 1 0 0 0 21.55 2 1 0.00 100 0 Through 0 0 1/2
Reduced-To-Convent Input-To-Reduced T = Input-To-Convent: a' = T a
( 1 0 0 ) ( 1 0 0 ) ( 1 0 0 ) Det(T)
( 0 1 0 ) x ( 0 -1 0 ) = ( 0 -1 0 ) =
( 0 0 1 ) ( 0 0 -1 ) ( 0 0 -1 ) = 1.000
Cell Lattice a b c Alpha Beta Gamma Volume Crystal System Louse
Input aP 8.617 11.806 21.547 90.00 90.00 90.00 2192 Orthorhombic mm
Reduced P 8.617 11.806 21.547 90.00 90.00 90.00 2192
Convent aP 8.617 11.806 21.547 90.00 90.00 90.00 2192 Orthorhombic mm
:: Origin Shifted to: 0.500, 0.500, 0.500 after Cell Transformation
:: SpaceGroup = P212121 - No Obvious Spacegroup Change Needed/Suggested

```

**Fig. S9** Post-refinement analysis for missing symmetry using PLATON's ADDSYM tool on isolated inorganic frameworks (i.e., without organic cations) in  $(C_3H_{10}N)_3PbBr_5$ . All the C, H, and N atoms were manually deleted from the fully refined structure using the CrystalMaker software.

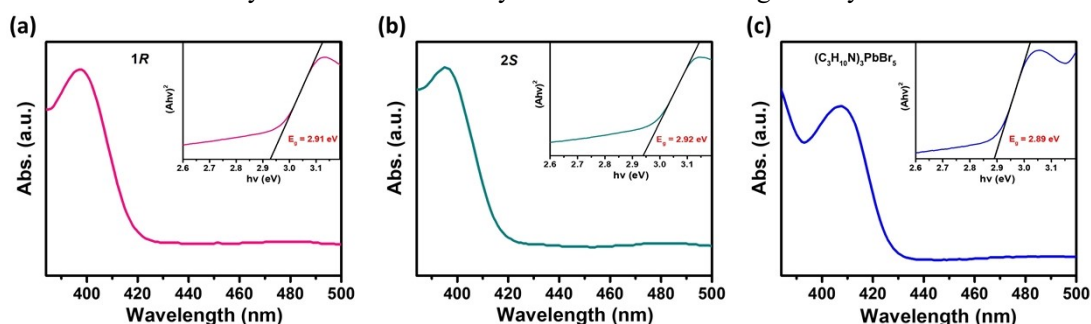

**Fig. S10** Solid-state UV-visible absorption spectra of (a) **1R**, (b) **2S** and (c)  $(C_3H_{10}N)_3PbBr_5$  at room temperature. The insets show the band gaps of **1R/2S** and  $(C_3H_{10}N)_3PbBr_5$ .

The optical bandgaps ( $E_g$ ) of **1R/2S** were obtained from the Tauc plot equation  $(hv F(R_\infty))^n = A(hv E_g)$  where  $h$  is Planck's constant,  $F(R_\infty)$  is the Kubelka–Munk function,  $\nu$  is the photon frequency, and  $A$  is the proportional constant. The bandgaps were estimated to be 2.91 (2.92) eV for **1R (2S)** and 2.89 eV for  $(C_3H_{10}N)_3PbBr_5$ .

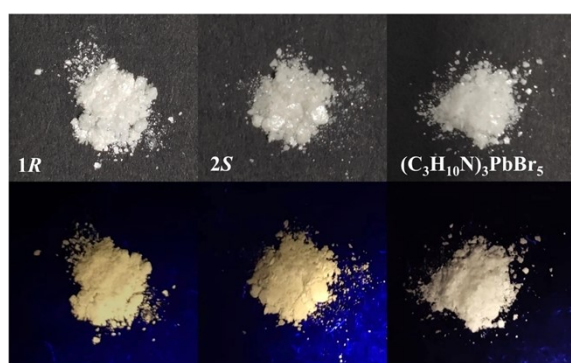

**Fig. S11** The optical photos of **1R/2S** and  $(C_3H_{10}N)_3PbBr_5$  under natural (top) and ultraviolet light (bottom).

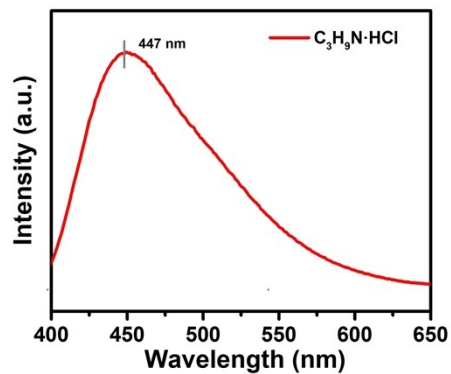

**Fig. S12** The emission spectrum of chiral ligand salt  $C_3H_9N \cdot HCl$ .

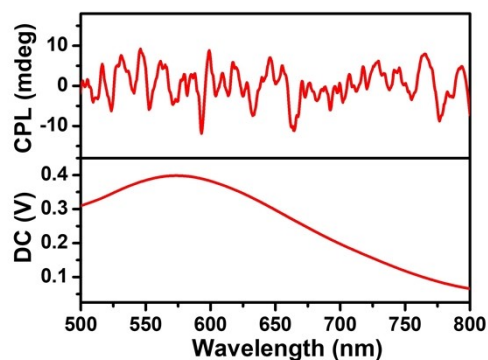

**Fig. S13** CPL spectrum (top) of  $(C_3H_{10}N)_3PbBr_5$  and the corresponding emission spectrum (bottom) in the solid state.

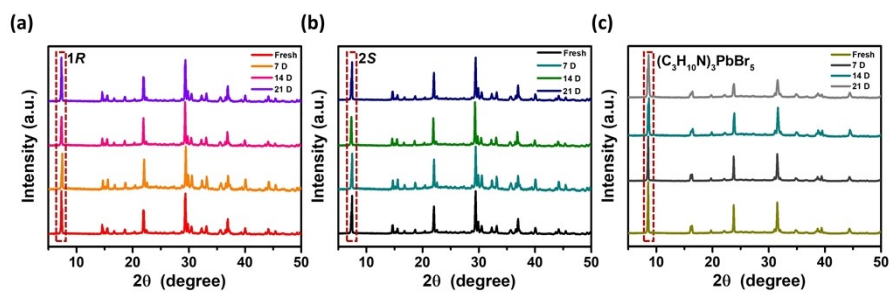

**Fig. S14** PXRD patterns of (a) **1R**, (b) **2S** and (c)  $(C_3H_{10}N)_3PbBr_5$  after exposure to 75% humidity for 7, 14 and 21 Days.

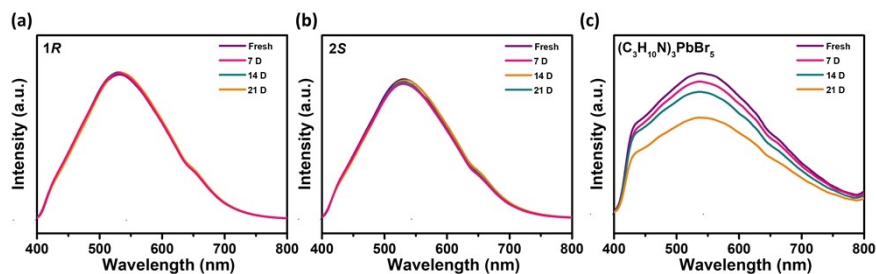

**Fig. S15** The PL spectra of fresh (a) **1R**, (b) **2S** and (c)  $(C_3H_{10}N)_3PbBr_5$  after exposure to 75% humidity for 7, 14 and 21 Days.



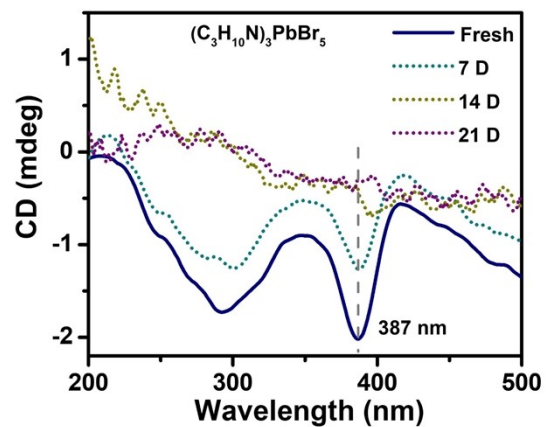

Fig. S16 The CD spectra of  $(C_3H_{10}N)_3PbBr_5$  after exposure to 75% humidity for 7, 14 and 21 Days.

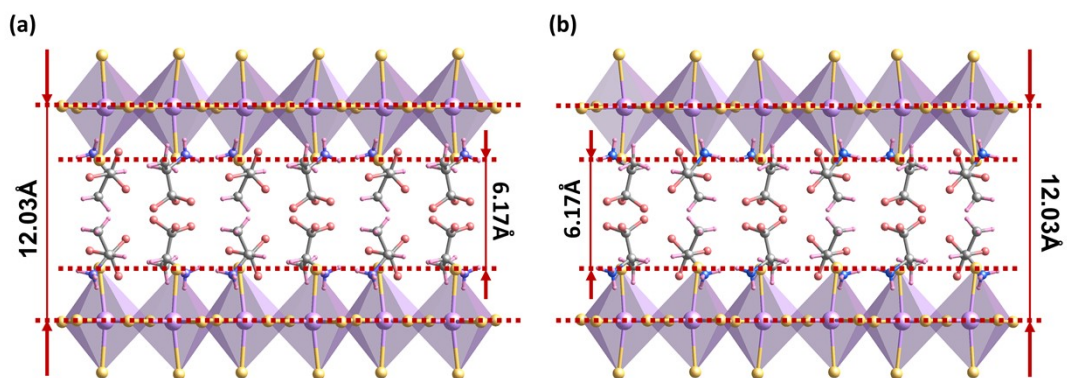

Fig. S17 The layer distances of (a) **1R** and (b) **2S**.

**Table S1.** Crystal data and structure refinement for compound **1R** and **2S**

|                                                       | <b>1R</b>                                                                       | <b>2S</b>                                                                       |
|-------------------------------------------------------|---------------------------------------------------------------------------------|---------------------------------------------------------------------------------|
| Empirical formula                                     | C <sub>6</sub> H <sub>14</sub> Br <sub>4</sub> F <sub>6</sub> N <sub>2</sub> Pb | C <sub>6</sub> H <sub>14</sub> Br <sub>4</sub> F <sub>6</sub> N <sub>2</sub> Pb |
| Formula weight                                        | 755.02                                                                          | 755.02                                                                          |
| Temperature/K                                         | 199.99(10)                                                                      | 200.00(10)                                                                      |
| Crystal system                                        | orthorhombic                                                                    | orthorhombic                                                                    |
| Space group                                           | <i>P</i> 2 <sub>1</sub> 2 <sub>1</sub>                                          | <i>P</i> 2 <sub>1</sub> 2 <sub>1</sub> 2                                        |
| <i>a</i> /Å                                           | 7.9087(2)                                                                       | 24.2480(2)                                                                      |
| <i>b</i> /Å                                           | 8.9042(3)                                                                       | 8.90729(7)                                                                      |
| <i>c</i> /Å                                           | 24.2405(8)                                                                      | 7.91028(7)                                                                      |
| $\alpha$ /°                                           | 90                                                                              | 90                                                                              |
| $\beta$ /°                                            | 90                                                                              | 90                                                                              |
| $\gamma$ /°                                           | 90                                                                              | 90                                                                              |
| Volume/Å <sup>3</sup>                                 | 1707.03(9)                                                                      | 1708.49(3)                                                                      |
| <i>Z</i>                                              | 4                                                                               | 4                                                                               |
| $\rho_{\text{calc}}$ /cm <sup>3</sup>                 | 2.938                                                                           | 2.935                                                                           |
| $\mu$ /mm <sup>-1</sup>                               | 30.669                                                                          | 30.643                                                                          |
| F(000)                                                | 1360                                                                            | 1360                                                                            |
| Crystal size/mm <sup>3</sup>                          | 0.03 × 0.02 × 0.02                                                              | 0.03 × 0.02 × 0.02                                                              |
| Radiation                                             | Cu K $\alpha$ ( $\lambda$ = 1.54184)                                            | Cu K $\alpha$ ( $\lambda$ = 1.54184)                                            |
| 2 $\theta$ range for data collection/°                | 7.294 to 147.568                                                                | 10.58 to 147.482                                                                |
| Index ranges                                          | -9 ≤ <i>h</i> ≤ 9, -6 ≤ <i>k</i> ≤ 10, -30 ≤ <i>l</i> ≤ 18                      | -30 ≤ <i>h</i> ≤ 30, -10 ≤ <i>k</i> ≤ 8, -9 ≤ <i>l</i> ≤ 9                      |
| Reflections collected                                 | 7425                                                                            | 15698                                                                           |
| Independent reflections                               | 3291 [ <i>R</i> <sub>int</sub> = 0.0724, <i>R</i> <sub>sigma</sub> = 0.0840]    | 3382 [ <i>R</i> <sub>int</sub> = 0.0767, <i>R</i> <sub>sigma</sub> = 0.0402]    |
| Data/restraints/parameters                            | 3291/0/176                                                                      | 3382/0/176                                                                      |
| Goodness-of-fit on F <sup>2</sup>                     | 1.030                                                                           | 1.123                                                                           |
| Final R indexes [ <i>I</i> ≥ 2 $\sigma$ ( <i>I</i> )] | <i>R</i> <sub>1</sub> = 0.0592, <i>wR</i> <sub>2</sub> = 0.1555                 | <i>R</i> <sub>1</sub> = 0.0627, <i>wR</i> <sub>2</sub> = 0.1930                 |
| Final R indexes [all data]                            | <i>R</i> <sub>1</sub> = 0.0622, <i>wR</i> <sub>2</sub> = 0.1587                 | <i>R</i> <sub>1</sub> = 0.0636, <i>wR</i> <sub>2</sub> = 0.1944                 |
| Largest diff. peak/hole / e Å <sup>-3</sup>           | 2.92/-2.62                                                                      | 6.42/-4.43                                                                      |
| Flack parameter                                       | 0.00(2)                                                                         | -0.001(11)                                                                      |
| CCDC                                                  | 2249682                                                                         | 2249985                                                                         |

$$R_1 = \sum ||F_o| - |F_c|| / \sum |F_o|. \quad wR_2 = [\sum w(F_o^2 - F_c^2)^2 / \sum w(F_o^2)^2]^{1/2}$$

**Table S2.** Selected bond lengths (Å) for compound **1R**

| Bond lengths (Å)     |           |                      |           |
|----------------------|-----------|----------------------|-----------|
| Pb1–Br2              | 3.177(17) | Pb1–Br1              | 2.946(2)  |
| Pb1–Br2 <sup>1</sup> | 2.979(15) | Pb1–Br4              | 2.986(17) |
| Pb1–Br3              | 3.014(2)  | Pb1–Br4 <sup>2</sup> | 3.118(15) |

Symmetry codes: <sup>1</sup>1-x, -1/2+y, 1/2-z; <sup>2</sup>-x, 1/2+y, 1/2-z; <sup>3</sup>1-x, 1/2+y, 1/2-z; <sup>4</sup>-x, -1/2+y, 1/2-z**Table S3.** Selected bond angles (°) for compound **1R**

| Bond angles (°)                        |           |                           |            |
|----------------------------------------|-----------|---------------------------|------------|
| Br2 <sup>1</sup> -Pb1-Br2              | 97.05(2)  | Br1-Pb1-Br3               | 168.13(6)  |
| Br2 <sup>1</sup> -Pb1-Br3              | 98.70(5)  | Br1-Pb1-Br4               | 89.48(5)   |
| Br2 <sup>1</sup> -Pb1-Br4              | 90.90(5)  | Br1-Pb1-Br4 <sup>2</sup>  | 85.25(6)   |
| Br2 <sup>1</sup> -Pb1-Br4 <sup>2</sup> | 173.06(5) | Br4-Pb1-Br2               | 172.05(5)  |
| Br3-Pb1-Br2                            | 87.70(5)  | Br4 <sup>2</sup> -Pb1-Br2 | 76.22(4)   |
| Br1-Pb1-Br2 <sup>1</sup>               | 82.89(6)  | Br4-Pb1-Br3               | 91.18(6)   |
| Br3-Pb1-Br2                            | 93.14(5)  | Br4-Pb1-Br4 <sup>2</sup>  | 95.830(16) |
| Br1-Pb1-Br2                            | 90.00(5)  |                           |            |

Symmetry codes: <sup>1</sup>1-x, -1/2+y, 1/2-z; <sup>2</sup>-x, 1/2+y, 1/2-z; <sup>3</sup>1-x, 1/2+y, 1/2-z; <sup>4</sup>-x, -1/2+y, 1/2-z**Table S4.** Selected bond lengths (Å) for compound **2S**

| Bond lengths (Å)     |           |                      |            |
|----------------------|-----------|----------------------|------------|
| Pb1–Br2 <sup>1</sup> | 2.980(17) | Pb1–Br4              | 3.016(2)   |
| Pb1–Br2              | 3.180(17) | Pb1–Br5 <sup>2</sup> | 3.114(17)  |
| Pb1–Br3              | 2.949(2)  | Pb1–Br5              | 2.9923(18) |

Symmetry codes: <sup>1</sup>1/2-x, -1/2+y, 1-z; <sup>2</sup>1/2-x, 1/2+y, -z; <sup>3</sup>1/2-x, 1/2+y, 1-z; <sup>4</sup>1/2-x, -1/2+y, -z**Table S5.** Selected bond angles (°) for compound **2S**

| Bond angles (°)                        |           |                           |            |
|----------------------------------------|-----------|---------------------------|------------|
| Br2 <sup>1</sup> -Pb1-Br2              | 97.03(2)  | Br3-Pb1-Br5 <sup>2</sup>  | 85.25(5)   |
| Br2 <sup>1</sup> -Pb1-Br4              | 98.73(5)  | Br4-Pb1-Br2               | 87.67(5)   |
| Br2 <sup>1</sup> -Pb1-Br5              | 90.88(5)  | Br4-Pb1-Br5 <sup>2</sup>  | 82.91(5)   |
| Br2 <sup>1</sup> -Pb1-Br5 <sup>2</sup> | 173.06(5) | Br5 <sup>2</sup> -Pb1-Br2 | 76.26(5)   |
| Br3-Pb1-Br2 <sup>1</sup>               | 93.08(5)  | Br5-Pb1-Br2               | 172.09(5)  |
| Br3-Pb1-Br2                            | 89.99(5)  | Br5-Pb1-Br4               | 91.20(5)   |
| Br3-Pb1-Br4                            | 168.15(6) | Br5-Pb1-Br5 <sup>2</sup>  | 95.830(18) |
| Br3-Pb1-Br5                            | 89.51(5)  |                           |            |

Symmetry codes: <sup>1</sup>1/2-x, -1/2+y, 1-z; <sup>2</sup>1/2-x, 1/2+y, -z; <sup>3</sup>1/2-x, 1/2+y, 1-z; <sup>4</sup>1/2-x, -1/2+y, -z

**Table S6.** Parameters of the hydrogen bonds in compound **1R**

| D-H      | d(D-H) (Å) | d(H..A) (Å) | <DHA (°) | d(D..A) (Å) | A   |
|----------|------------|-------------|----------|-------------|-----|
| N1-H1A   | 0.910      | 2.554       | 152.68   | 3.388       | BR3 |
| N1-H1B   | 0.910      | 2.774       | 126.30   | 3.393       | BR2 |
| N1-H1B   | 0.910      | 3.048       | 110.82   | 3.477       | BR5 |
| N1-H1C   | 0.910      | 2.391       | 177.93   | 3.301       | BR4 |
| N3-H3A   | 0.910      | 2.858       | 117.35   | 3.374       | BR2 |
| N3-H3B   | 0.910      | 2.458       | 162.84   | 3.338       | BR4 |
| N3-H3C   | 0.910      | 2.429       | 155.42   | 3.279       | BR3 |
| C13-H13A | 0.980      | 2.639       | 120.11   | 3.244       | F7  |
| C13-H13C | 0.980      | 3.011       | 137.55   | 3.792       | BR3 |
| C15-H15A | 0.980      | 3.041       | 114.65   | 3.563       | BR4 |
| C15-H15B | 0.980      | 2.980       | 136.36   | 3.750       | BR3 |
| C15-H15C | 0.980      | 3.056       | 147.77   | 3.920       | BR5 |

Symmetry codes:  $-x, y+1/2, -z+1/2$ ;  $-x, -y+5/2, z+1/2$ ;  $x, y+1, z$ ;  $-x+1, y+1/2, -z+1/2$ .

**Table S7.** Parameters of the hydrogen bonds in compound **2S**

| D-H      | d(D-H) (Å) | d(H..A) (Å) | <DHA (°) | d(D..A) (Å) | A   |
|----------|------------|-------------|----------|-------------|-----|
| N1-H1A   | 0.910      | 2.706       | 135.63   | 3.417       | BR2 |
| N1-H1A   | 0.910      | 3.045       | 112.50   | 3.495       | BR5 |
| N1-H1B   | 0.910      | 2.489       | 163.18   | 3.371       | BR4 |
| N1-H1C   | 0.910      | 2.424       | 168.12   | 3.320       | BR3 |
| C8-H8A   | 0.980      | 2.614       | 122.16   | 3.243       | F10 |
| C8-H8B   | 0.980      | 2.982       | 138.17   | 3.769       | BR4 |
| N9-H9A   | 0.910      | 2.425       | 156.23   | 3.278       | BR4 |
| N9-H9B   | 0.910      | 2.453       | 164.67   | 3.339       | BR3 |
| N9-H9C   | 0.910      | 2.835       | 118.73   | 3.368       | BR2 |
| C10-H10B | 0.980      | 3.048       | 128.37   | 3.736       | BR4 |
| C10-H10C | 0.980      | 3.048       | 115.16   | 3.576       | BR3 |

Symmetry codes:  $-x+1/2, y-1/2, -z$ ;  $x-1/2, -y+1/2, -z$ ;  $x, y, z-1$ ;  $-x+1/2, y+1/2, -z$ .

**Table S8.** Crystal data and structure refinement for compound  $(C_3H_{10}N)_3PbBr_5$ 

| $(C_3H_{10}N)_3PbBr_5$ |                      |
|------------------------|----------------------|
| Empirical formula      | $C_9H_{30}Br_5N_3Pb$ |
| Formula weight         | 787.10               |
| Temperature/K          | 200.00(10)           |
| Crystal system         | orthorhombic         |
| Space group            | $P2_12_12_1$         |
| $a/\text{Å}$           | 8.6172(3)            |
| $b/\text{Å}$           | 11.8062(5)           |
| $c/\text{Å}$           | 21.5472(9)           |
| $\alpha/^\circ$        | 90                   |

|                                                |                                                               |
|------------------------------------------------|---------------------------------------------------------------|
| $\beta/^\circ$                                 | 90                                                            |
| $\gamma/^\circ$                                | 90                                                            |
| Volume/ $\text{\AA}^3$                         | 2192.13(15)                                                   |
| Z                                              | 4                                                             |
| $\rho_{\text{calc}}/\text{g cm}^3$             | 2.385                                                         |
| $\mu/\text{mm}^{-1}$                           | 16.802                                                        |
| F(000)                                         | 1448                                                          |
| Crystal size/ $\text{mm}^3$                    | $0.03 \times 0.02 \times 0.02$                                |
| Radiation                                      | Mo K $\alpha$ ( $\lambda = 0.71073$ )                         |
| 2 $\theta$ range for data collection/ $^\circ$ | 3.78 to 57.748                                                |
| Index ranges                                   | $-11 \leq h \leq 9, -12 \leq k \leq 16, -23 \leq l \leq 28$   |
| Reflections collected                          | 12421                                                         |
| Independent reflections                        | 4853 [ $R_{\text{int}} = 0.0357, R_{\text{sigma}} = 0.0531$ ] |
| Data/restraints/parameters                     | 4853/34/181                                                   |
| Goodness-of-fit on $F^2$                       | 1.160                                                         |
| Final R indexes [ $I \geq 2\sigma(I)$ ]        | $R_1 = 0.0353, wR_2 = 0.0890$                                 |
| Final R indexes [all data]                     | $R_1 = 0.0470, wR_2 = 0.1142$                                 |
| Largest diff. peak/hole / $e \text{\AA}^{-3}$  | 1.35/-2.15                                                    |
| Flack parameter                                | -0.014(7)                                                     |
| CCDC                                           | 2249681                                                       |

$$R_1 = \frac{\sum ||F_o| - |F_c||}{\sum |F_o|}, wR_2 = \left[ \frac{\sum w(F_o^2 - F_c^2)^2}{\sum w(F_o^2)^2} \right]^{1/2}$$

**Table S9.** Selected bond lengths ( $\text{\AA}$ ) for compound  $(\text{C}_3\text{H}_{10}\text{N})_3\text{PbBr}_5$

| Bond lengths ( $\text{\AA}$ ) |           |         |           |
|-------------------------------|-----------|---------|-----------|
| Pb1–Br5                       | 3.048(15) | Pb1–Br2 | 2.935(16) |
| Pb1–Br3 <sup>1</sup>          | 3.103(14) | Pb1–Br4 | 3.098(17) |
| Pb1–Br3                       | 3.005(14) | Pb1–Br1 | 2.912(17) |

Symmetry codes: <sup>1</sup> $1/2+x, 3/2-y, 1-z$ ; <sup>2</sup> $-1/2+x, 3/2-y, 1-z$ .

**Table S10.** Selected bond angles ( $^\circ$ ) for compound  $(\text{C}_3\text{H}_{10}\text{N})_3\text{PbBr}_5$

| Bond angles ( $^\circ$ ) |            |                          |           |
|--------------------------|------------|--------------------------|-----------|
| Br5-Pb1-Br3 <sup>1</sup> | 81.89(4)   | Br2-Pb1-Br3              | 85.50 (4) |
| Br5-Pb1-Br4              | 91.56(5)   | Br2-Pb1-Br3 <sup>1</sup> | 85.21(4)  |
| Br3-Pb1-Br5              | 172.18(4)  | Br2-Pb1-Br4              | 164.84(5) |
| Br3-Pb1-Br3 <sup>1</sup> | 92.422(15) | Br4-Pb1-Br3 <sup>1</sup> | 85.90(4)  |
| Br3-Pb1-Br4              | 82.63(4)   | Br1-Pb1-Br5              | 98.58(5)  |

|                          |           |             |           |
|--------------------------|-----------|-------------|-----------|
| Br2-Pb1-Br5              | 99.30(4)  | Br1-Pb1-Br3 | 87.71(5)  |
| Br1-Pb1-Br3 <sup>1</sup> | 173.19(5) | Br1-Pb1-Br4 | 100.87(5) |
| Br1-Pb1-Br2              | 88.01(5)  |             |           |

Symmetry codes  $1/2+x, 3/2-y, 1-z$ ;  $2-1/2+x, 3/2-y, 1-z$ .

**Table S11.** Parameters of the hydrogen bonds in compound (C<sub>3</sub>H<sub>10</sub>N)<sub>3</sub>PbBr<sub>5</sub>

| D-H    | d(D-H) (Å) | d(H..A) (Å) | <DHA (°) | d(D..A) (Å) | A   |
|--------|------------|-------------|----------|-------------|-----|
| C3-H3A | 0.980      | 3.037       | 111.43   | 3.516       | BR3 |
| C3-H3B | 0.980      | 3.057       | 119.27   | 3.638       | BR3 |
| C3-H3C | 0.980      | 2.556       | 168.71   | 3.523       | BR5 |
| C8-H8B | 0.980      | 2.597       | 159.56   | 3.532       | BR2 |
| C8-H8A | 0.980      | 2.568       | 160.05   | 3.505       | BR3 |
| C4-H4A | 0.980      | 2.384       | 162.22   | 3.331       | BR4 |
| C4-H4B | 0.980      | 2.554       | 134.99   | 3.320       | BR5 |
| C4-H4C | 0.980      | 2.415       | 166.80   | 3.376       | BR1 |
| C1-H1F | 0.980      | 3.053       | 132.91   | 3.789       | BR2 |
| C7-H7A | 0.980      | 3.132       | 139.05   | 3.925       | BR2 |
| C6-H6C | 0.980      | 3.063       | 150.46   | 3.945       | BR5 |
| C9-H9A | 1.00       | 2.964       | 132.23   | 3.711       | BR4 |

Symmetry codes:  $x-1/2, -y+3/2, -z+1$ ;  $x-1, y, z$ ;  $x+1/2, -y+3/2, -z+1$ ;  $x+1, y, z$ ;  $-x+1, y+1/2, -z+1/2$ ;

## References

- [1] CrysAlisPro **2012**, Agilent Technologies. Version 1.171.36.31.
- [2] Sheldrick, G. M. *Acta Crystallogr. Sect. A* **2015**, *71*, 3-8.
- [3] Dolomanov, O. V.; Bourhis, L. J.; Gildea, R. J.; Howard, J. A. K.; Puschmann, H. OLEX2: A Complete Structure Solution, Refinement and Analysis Program. *J. Appl. Cryst.* **2009**, *42*, 339-341.
- [4] Sheldrick, G. M. Crystal Structure Refinement with SHELXL. *Acta Cryst. C* **2015**, *71*, 3-8.
- [5] Kresse, G.; Hafner, J. Ab Initio Molecular Dynamics for Open-Shell Transition Metals *Phys. Rev. B* **1993**, *48*, 13115–13118.
- [6] Kresse, G.; Furthmüller, J. Efficient Iterative Schemes for Ab Initio Total-Energy Calculations Using a Plane-wave Basis Set. *Phys. Rev. B* **1996**, *54*, 11169–11186.
- [7] Perdew, J. P.; Burke, K.; Ernzerhof, M. Generalized Gradient Approximation Made Simple. *Phys. Rev. Lett.* **1996**, *77*, 3865–3868.
- [8] Grimme, S.; Antony, J.; Ehrlich, S.; Krieg, H. A Consistent and Accurate Ab Initio Parametrization of Density Functional Dispersion Correction (DFT-D) for the 94 Elements H-Pu. *J. Chem. Phys.* **2010**, *132*, 154104.
- [9] Grimme, S., Wiley Interdiscip. *Rev. Mol. Sci.* **2011**, *1*, 211–228.
